# Supplementary material for: Colorimetric detection of cysteine and homocysteine based on an oligonucleotide-stabilized Pd nanozyme
Source: Royal Society of Chemistry journal article supplement (doi:10.1039/c6ay01097k), 2016-01-01
Supplement: c6ay01097k1.pdf [file c6ay01097k1.pdf]

## Supporting Information

Table S1 Results of spiked studies in human serum samples

|     | Spiked (nM) | Calculated (nM) | Recovery (%) |
|-----|-------------|-----------------|--------------|
| Cys | 50          | 54.7±3.9        | 109.4        |
|     | 100         | 97.2±2.6        | 97.2         |
| Hcy | 50          | 52.1±4.1        | 104.2        |
|     | 100         | 98.9±2.8        | 98.9         |

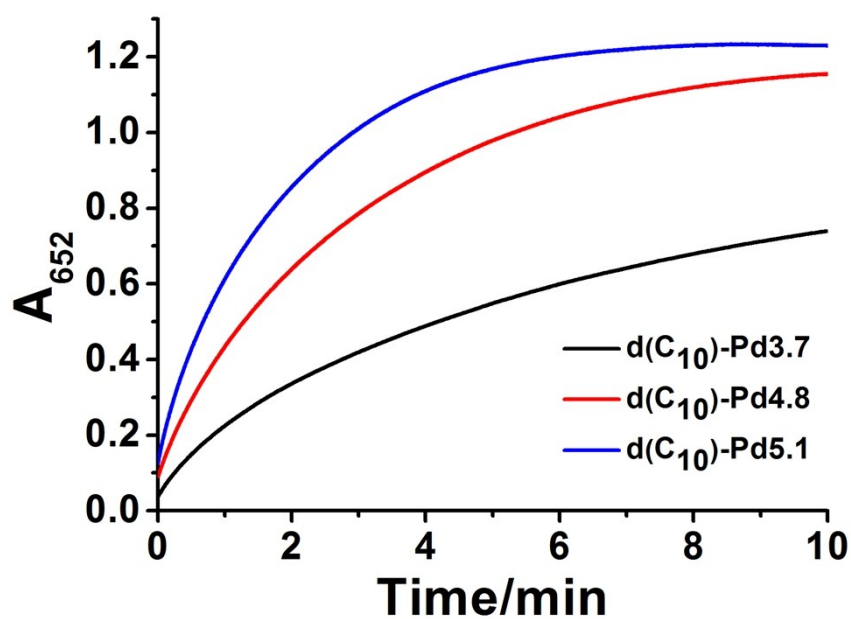

Fig. S1 UV-vis absorption-time course curves of TMB- $H_2O_2$  reaction system catalyzed by different  $d(C_{10})$ -Pd at 20 °C.

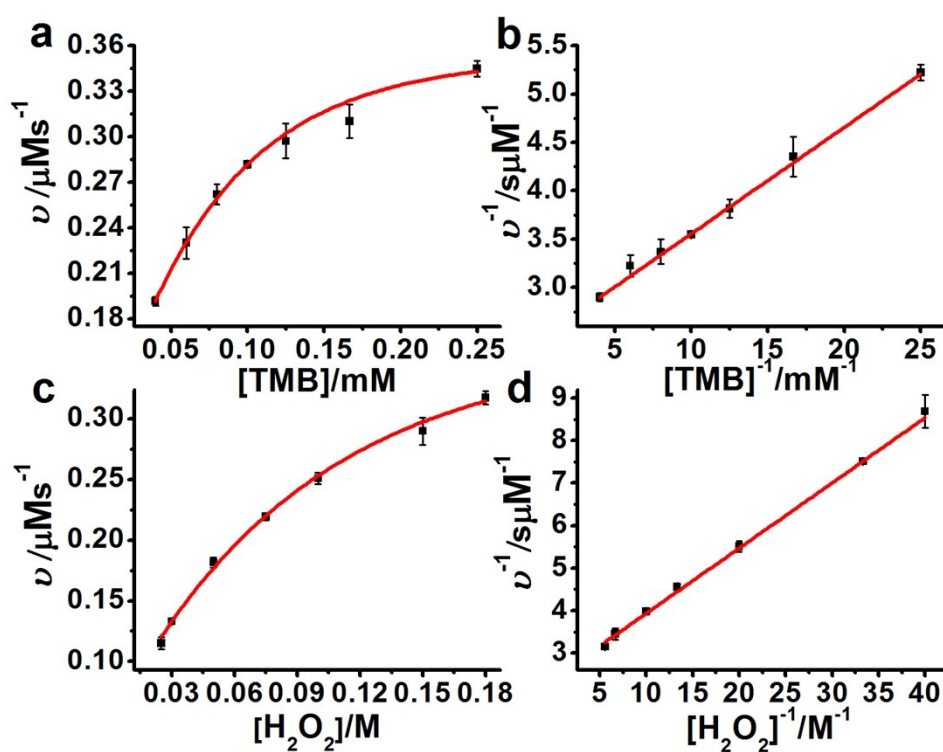

Fig. S2 Steady-state kinetics of d(C<sub>10</sub>)-Pd5.1 are measured through the oxidization of TMB in the presence of H<sub>2</sub>O<sub>2</sub> at 20 °C at pH 4.0 using 900 nM Pd (calculated from precursor): (a) The concentration of H<sub>2</sub>O<sub>2</sub> is fixed at 125 mM and the TMB concentration is varied, (c) The concentration of TMB is fixed at 0.125 mM and the H<sub>2</sub>O<sub>2</sub> concentration is varied, (b) and (d) are double-reciprocal plots of (a) and (c), respectively.

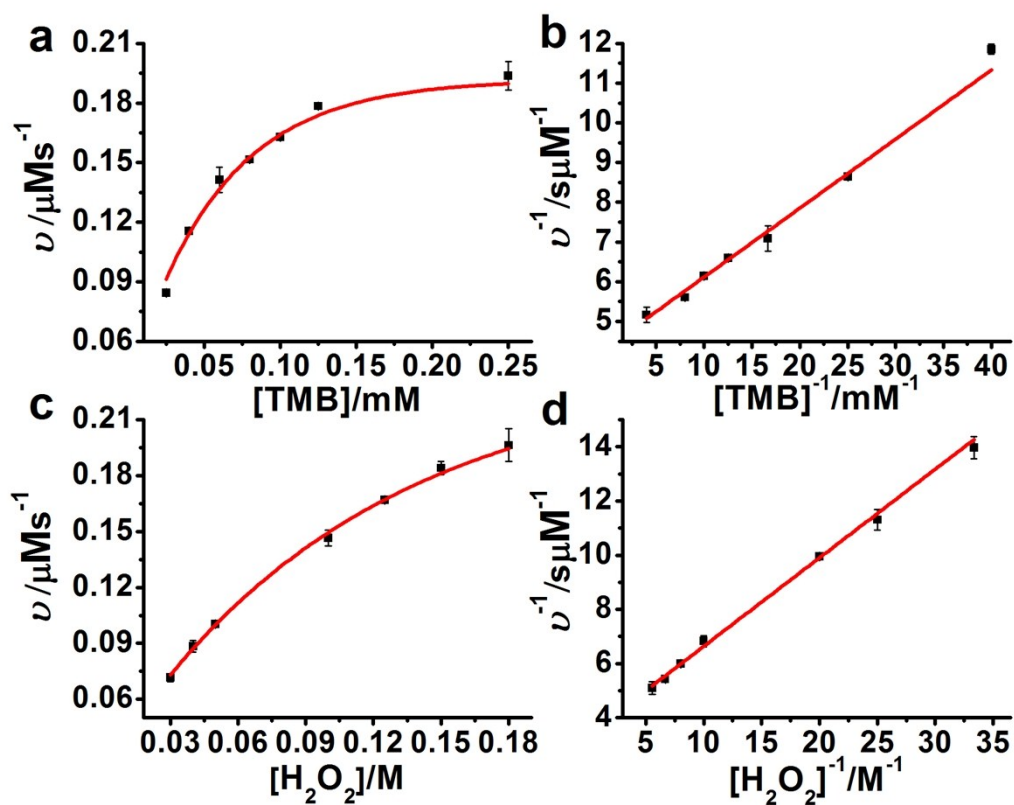

Fig. S3 Steady-state kinetics of d(C<sub>10</sub>)-Pd<sub>4.8</sub> are measured using 900 nM Pd (calculated from precursor) in the presence of 150 nM Cys: (a) The concentration of H<sub>2</sub>O<sub>2</sub> is fixed at 125 mM and the TMB concentration is varied, (c) The concentration of TMB is fixed at 0.125 mM and the H<sub>2</sub>O<sub>2</sub> concentration is varied, (b) and (d) are double-reciprocal plots of (a) and (c), respectively.

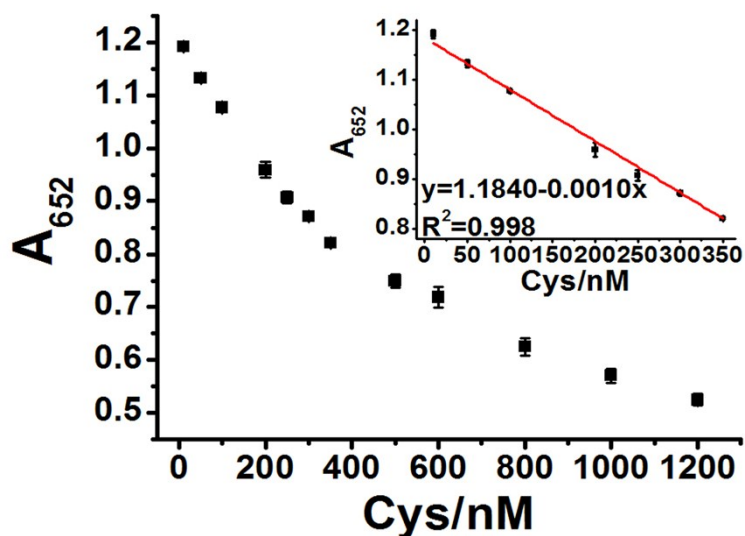

Fig. S4 Plots of the  $A_{652}$  with the concentration of Cys using d(C<sub>10</sub>)-Pd5.1, and the inset is corresponding calibration curve.

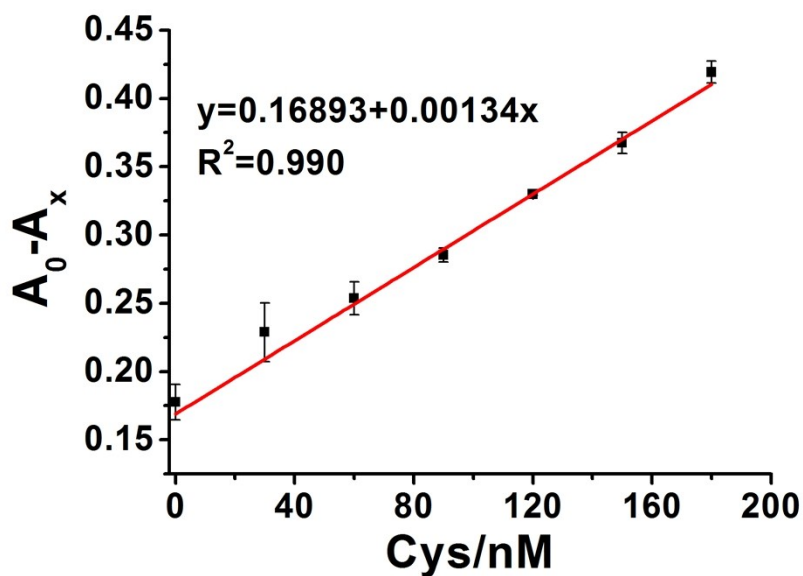

Fig. S5 Calibration curve for Cys in human serum samples,  $A_0$  represents the  $A_{652}$  collected from the TMB- $H_2O_2$  reaction in  $NaH_2PO_4$ - $Na_2HPO_4$  buffer (pH 4.0) catalyzed by d(C<sub>10</sub>)-Pd4.8, and  $A_x$  represents the  $A_{652}$  collected from the TMB- $H_2O_2$  reaction in diluted serum (pH 4.0) catalyzed by d(C<sub>10</sub>)-Pd4.8 in the absence and presence of Cys. The  $A_{652}$  signal was collected at 10 min after initiation. The concentration of Cys in diluted human serum was determined as the epitaxial linear fellowship at horizontal axis.
